# Supplementary material
Source: PubMed Central journal article supplement (PMC2898718)
Supplement: NIHMS206207-supplement-01.pdf [file NIHMS206207-supplement-01.pdf]

**“Supplementary Data”**

**Chemo-enzymatic Synthesis of the Carbohydrate Antigen N-  
Glycolylneuraminic Acid from Glucose**

Oliver M. T. Pearce<sup>a</sup>, Ajit Varki<sup>a\*</sup>

<sup>a</sup>Department of Cellular and Molecular Medicine  
University of California at San Diego  
9500 Gilman Dr. La Jolla, CA, 92093-0687

\*Corresponding author

Fax: (+1) 858 534-5611

E-mail: [varkiadmin@ucsd.edu](mailto:varkiadmin@ucsd.edu)

#### 4 SA Std Mixt 1nM

|                  |                 |                   |        |
|------------------|-----------------|-------------------|--------|
| Sample Name:     | SA Std Mixt 1nM | Injection Volume: | 100.0  |
| Vial Number:     | 2               | Channel:          | ED_1   |
| Sample Type:     | standard        | Wavelength:       | n.a.   |
| Control Program: | Sialic Acid-PA1 | Bandwidth:        | n.a.   |
| Quantif. Method: | SIA             | Dilution Factor:  | 1.0000 |
| Recording Time:  | 2/2/2010 16:09  | Sample Weight:    | 1.0000 |
| Run Time (min):  | 33.17           | Sample Amount:    | 1.0000 |

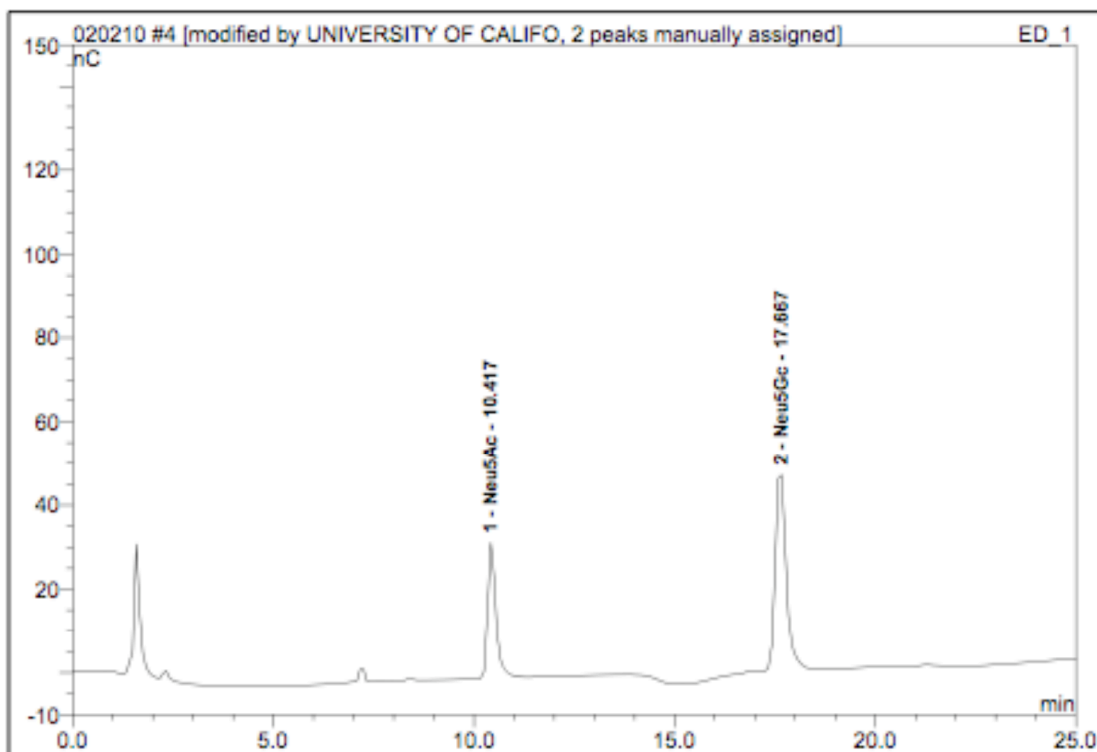

| No.           | Ret.Time<br>min | Peak Name | Height<br>nC | Area<br>nC*min | Rel.Area<br>% | Amount<br>nM | Type             |
|---------------|-----------------|-----------|--------------|----------------|---------------|--------------|------------------|
| 1             | 10.42           | Neu5Ac    | 32.330       | 7.768          | 33.97         | 1.000        | BMB <sup>^</sup> |
| 2             | 17.67           | Neu5Gc    | 46.737       | 15.098         | 66.03         | 1.000        | BMB <sup>^</sup> |
| <b>Total:</b> |                 |           | 79.067       | 22.866         | 100.00        | 2.000        |                  |

Figure S1. Pulsed amperometry of Neu5Gc and Neu5Ac standard.

**5 # 1 Neu5Gc+1.9%Ac (1ug)**

|                  |                         |                   |        |
|------------------|-------------------------|-------------------|--------|
| Sample Name:     | # 1 Neu5Gc+1.9%Ac (1ug) | Injection Volume: | 100.0  |
| Vial Number:     | 3                       | Channel:          | ED_1   |
| Sample Type:     | unknown                 | Wavelength:       | n.a.   |
| Control Program: | Sialic Acid-PA1         | Bandwidth:        | n.a.   |
| Quantif. Method: | SIA                     | Dilution Factor:  | 1.0000 |
| Recording Time:  | 2/2/2010 16:46          | Sample Weight:    | 1.0000 |
| Run Time (min):  | 33.17                   | Sample Amount:    | 1.0000 |

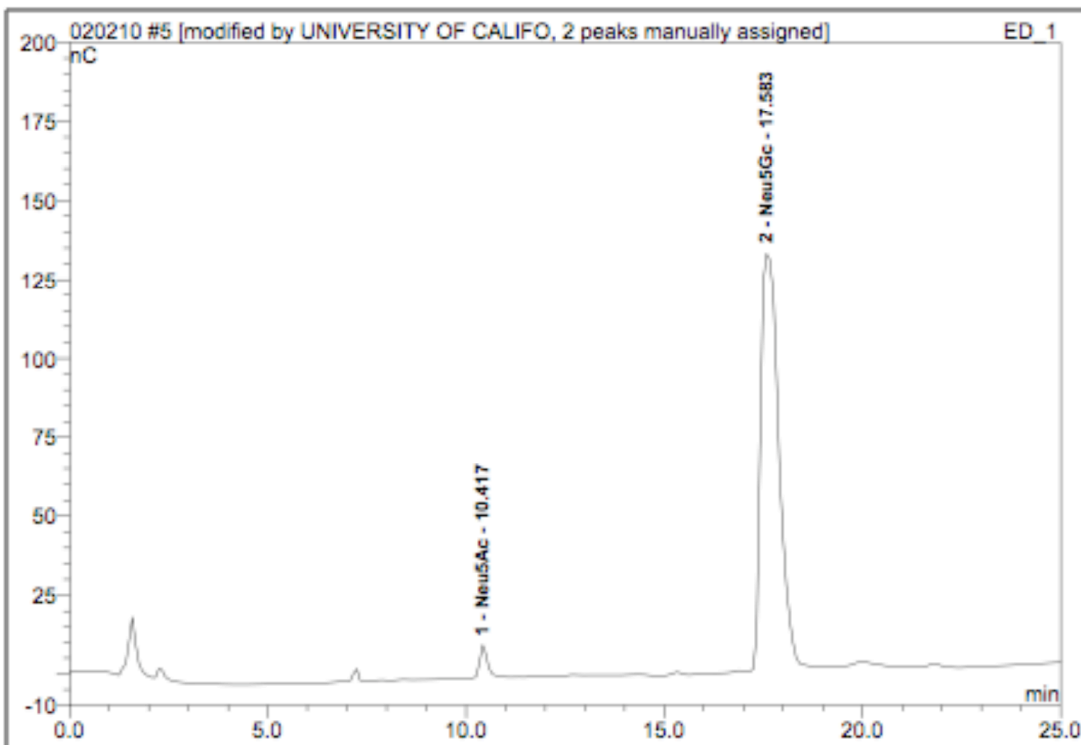

| No.           | Ret.Time<br>min | Peak Name | Height<br>nC | Area<br>nC*min | Rel.Area<br>% | Amount<br>nM | Type  |
|---------------|-----------------|-----------|--------------|----------------|---------------|--------------|-------|
| 1             | 10.42           | Neu5Ac    | 10.372       | 2.347          | 3.23          | 0.302        | BMB*^ |
| 2             | 17.58           | Neu5Gc    | 132.121      | 70.314         | 96.77         | 4.657        | BMB*^ |
| <b>Total:</b> |                 |           | 142.494      | 72.661         | 100.00        | 4.959        |       |

Figure S2. Pulsed amperometric analysis of commercial Neu5Gc. Found to contain approx 3 % Neu5Ac.

| <b>6 #2 Neu5Gc (1ug)</b> |                 |                   |        |
|--------------------------|-----------------|-------------------|--------|
| Sample Name:             | #2 Neu5Gc (1ug) | Injection Volume: | 100.0  |
| Vial Number:             | 4               | Channel:          | ED_1   |
| Sample Type:             | unknown         | Wavelength:       | n.a.   |
| Control Program:         | Sialic Acid-PA1 | Bandwidth:        | n.a.   |
| Quantif. Method:         | SIA             | Dilution Factor:  | 1.0000 |
| Recording Time:          | 2/2/2010 17:23  | Sample Weight:    | 1.0000 |
| Run Time (min):          | 33.17           | Sample Amount:    | 1.0000 |

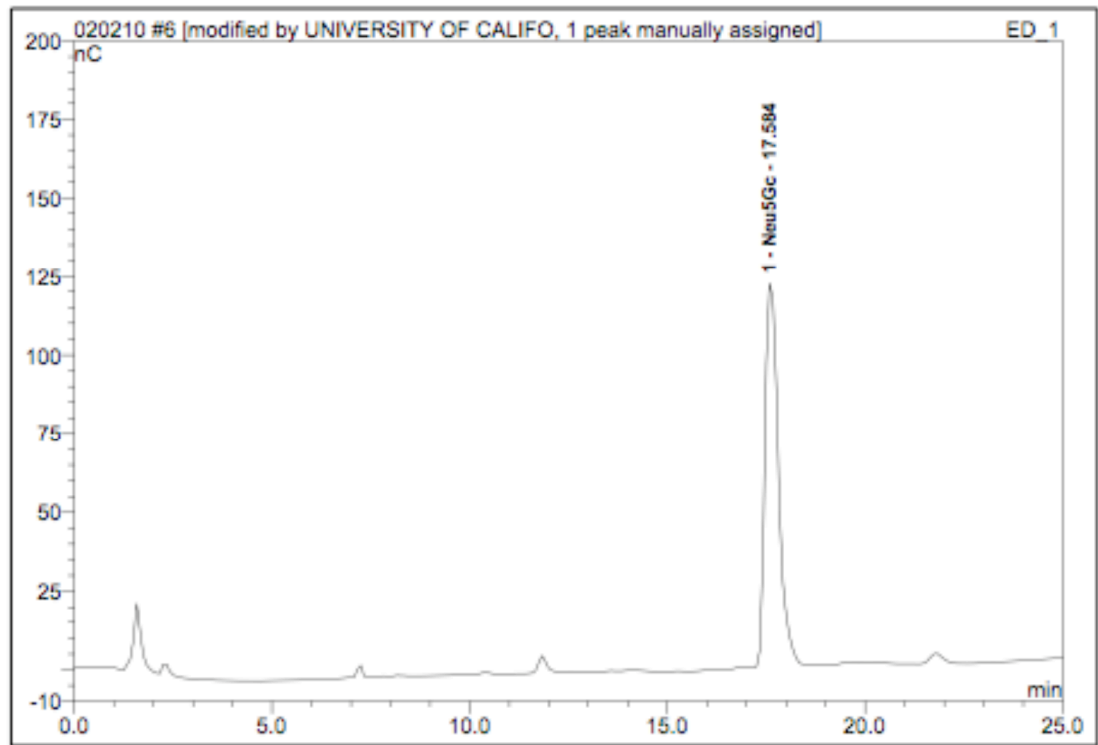

| No.           | Ret.Time<br>min | Peak Name | Height<br>nC | Area<br>nC*min | Rel.Area<br>% | Amount<br>nM | Type  |
|---------------|-----------------|-----------|--------------|----------------|---------------|--------------|-------|
| 1             | 17.58           | Neu5Gc    | 121.740      | 48.117         | 100.00        | 3.187        | BMB^^ |
| <b>Total:</b> |                 |           | 121.740      | 48.117         | 100.00        | 3.187        |       |

Figure S3. Pulsed amperometric analysis of synthesized Neu5Gc. No Neu5Ac contamination was seen.
